# Supplementary material for: The lipid-sensor TREM2 aggravates disease in a model of LCMV-induced hepatitis
Source: PubMed Central journal article supplement (PMC5595927; doi:10.1038/s41598-017-10637-y), 2017-09-12

1 **Supplementary Information**

2

3 **The lipid-sensor TREM2 aggravates disease in a model of LCMV-induced hepatitis**

4

5 Lindsay Kosack<sup>1,\*</sup>, Riem Gawish<sup>1,2,3\*</sup>, Alexander Lercher<sup>1</sup>, Bojan Vilagos<sup>1</sup>, Anastasiya Hladik<sup>1,2</sup>,  
6 Karin Lakovits<sup>1,2</sup>, Anannya Bhattacharya<sup>1,§</sup>, Christopher Schliehe<sup>1,§§</sup>, Ildiko Mesteri<sup>4</sup>, Sylvia  
7 Knapp<sup>1,2,\*\*</sup> and Andreas Bergthaler<sup>1,\*\*</sup>

8

9

10 **Fig. S1 Serum lipid changes on day 2 and Ppar- $\delta$  reporter assay.** (A) Serum from WT mice  
11 infected with LCMV strain WE two days previously was used for targeted metabolomics (n=4 mice  
12 per group). Bubble plot of individual glycerophospholipids (circles) and sphingolipids (triangles)  
13 depicting fold-change (x-axis), p-value (y-axis) and the absolute change (size of symbols). Red  
14 symbols reflect metabolites with a fold-change >1.5 and a p-value <0.05. (B-C) Ppar- $\delta$  reporter  
15 assay results from WT and *Trem2*<sup>-/-</sup> mouse embryonic fibroblasts stimulated with serum-extracted  
16 lipids (B, n=3-4) or pure lipids (C, n=4) as described in Methods. Statistical significance was  
17 calculated by unpaired t-test. Bars represent the mean  $\pm$  SEM.

18

19 **Fig. S2 Similar kidney-specific serum parameters in WT and *Trem2*<sup>-/-</sup> mice.** (A-B) WT and  
20 *Trem2*<sup>-/-</sup> mice were infected with LCMV strain WE. Serum levels of blood urea nitrogen (BUN) (A)  
21 and creatinine (B) were measured eight and ten days post infection (n=5 mice per group,  
22 representative of two independent experiments). Statistical significance was calculated by Two-way  
23 ANOVA with Bonferroni correction. Bars represent the mean  $\pm$  SEM.

24

25 **Fig. S3 Similar viral propagation in primary WT and *Trem2*<sup>-/-</sup> macrophages.** BMDMs from  
26 WT and *Trem2*<sup>-/-</sup> mice were isolated *ex vivo* and left uninfected or infected with LCMV strain WE

1 (MOI 0.01). Viral loads from cell culture supernatants were quantified by immunological focus  
2 assay (n=3 mice per group, representative of two independent (similar) experiments). Symbols  
3 represent the mean  $\pm$  SEM.

4  
5 **Fig. S4 CD8<sup>+</sup> and CD4<sup>+</sup> effector memory T cell responses and FACS gating strategy for**  
6 **intracellular cytokine staining.** WT and *Trem2*<sup>-/-</sup> mice were infected with LCMV strain WE (A-F).  
7 CD44<sup>hi</sup> CD62<sup>lo</sup> CD8<sup>+</sup> effector memory T cells were quantified in liver and spleen (A-B) before,  
8 four and eight days post infection (n=4 mice per genotype). CD44<sup>hi</sup> CD62<sup>lo</sup> CD4<sup>+</sup> effector memory  
9 T cells were quantified in liver and spleen (C-D) before, four and eight days post infection (n=4  
10 mice per group). Statistical significance was calculated by Two-way ANOVA. Bars represent the  
11 mean  $\pm$  SEM. (E-F) FACS gating strategy for data shown in Fig. 4.

12  
13 **Fig. S5 Concanavalin A induced acute hepatitis in WT and *Trem2*<sup>-/-</sup> mice.** (A) WT and *Trem2*<sup>-/-</sup>  
14 mice received either PBS or 10 mg/kg concanavalin A i.p. (A-B). Serum kinetics of ALT (A) and  
15 AST (B) were measured 24 hours post treatment (n=6 infected mice and one untreated mouse per  
16 genotype). Statistical significance was calculated by unpaired t test. Bars represent the mean  $\pm$   
17 SEM.

18  
19 **Fig. S6 Profiling of lymphocyte populations in LCMV-infected WT and *Trem2*<sup>-/-</sup> mice.** WT and  
20 *Trem2*<sup>-/-</sup> mice were infected with LCMV strain WE (A-F).  $\gamma/\delta$  T cell (CD19<sup>-</sup> CD3<sup>+</sup> TCR $\gamma/\delta$ <sup>+</sup>), NK  
21 cells (CD19<sup>-</sup> CD3<sup>-</sup> NK1.1<sup>+</sup>), NKT cells (CD19<sup>-</sup> CD3<sup>+</sup> NK1.1<sup>+</sup>), neutrophils (CD19<sup>-</sup> Ly6G<sup>+</sup>) and  
22 macrophages (CD19<sup>-</sup> CD11c<sup>-</sup> F4/80<sup>+</sup>) were quantified in liver and spleen before, four and eight  
23 days post infection (n=4 mice per group). Statistical significance was calculated by Two-way  
24 ANOVA. Bars represent the mean  $\pm$  SEM.

25

1 **Fig. S7 Serum cytokine responses in LCMV-infected WT and *Trem2*<sup>-/-</sup> mice.** WT and *Trem2*<sup>-/-</sup>  
2 mice were infected with LCMV WE, and serum was collected at various time points post infection  
3 **(A-C).** Serum kinetics of **(A)** IFN $\alpha$  (12-15 infected and 3 uninfected mice per genotype pooled  
4 from three independent experiments), **(B)** interleukin-6 (8-9 mice per genotype pooled from two  
5 independent experiments), and **(C)** CXCL1 (4-9 mice per genotype pooled from two independent  
6 experiments). Statistical significance was calculated by Two-way ANOVA with Bonferroni  
7 correction. Symbols respectively bars represent the mean  $\pm$  SEM.

8  
9 **Fig. S8 Confirmation of bone marrow reconstitution.** Reconstitution of relevant cell types was  
10 confirmed by FACS analysis of WT mice that were reconstituted with bone marrow of *CD45.l*  
11 mice. Bars represent the mean of 2 mice **(A)**. FACS gating strategy **(B)**.

12  
13 **Fig. S9 *Trem2* expression in primary macrophages and hepatocytes.** **(A)** Bone marrow-derived  
14 macrophages and **(B)** primary mouse hepatocytes were seeded at  $1 \times 10^6$  cells per well and infected  
15 with LCMV at an MOI of 0.01. Expression of *Trem2* and *GAPDH* was analyzed by real-time PCR  
16 at the respective time points and normalized to *Eef1a*. Symbols represent the mean  $\pm$  SEM.

17  
18 **Table S1 Quantification of serum metabolites**

Figure S1: Serum lipid changes on day 2 and Ppar- $\delta$  reporter assay

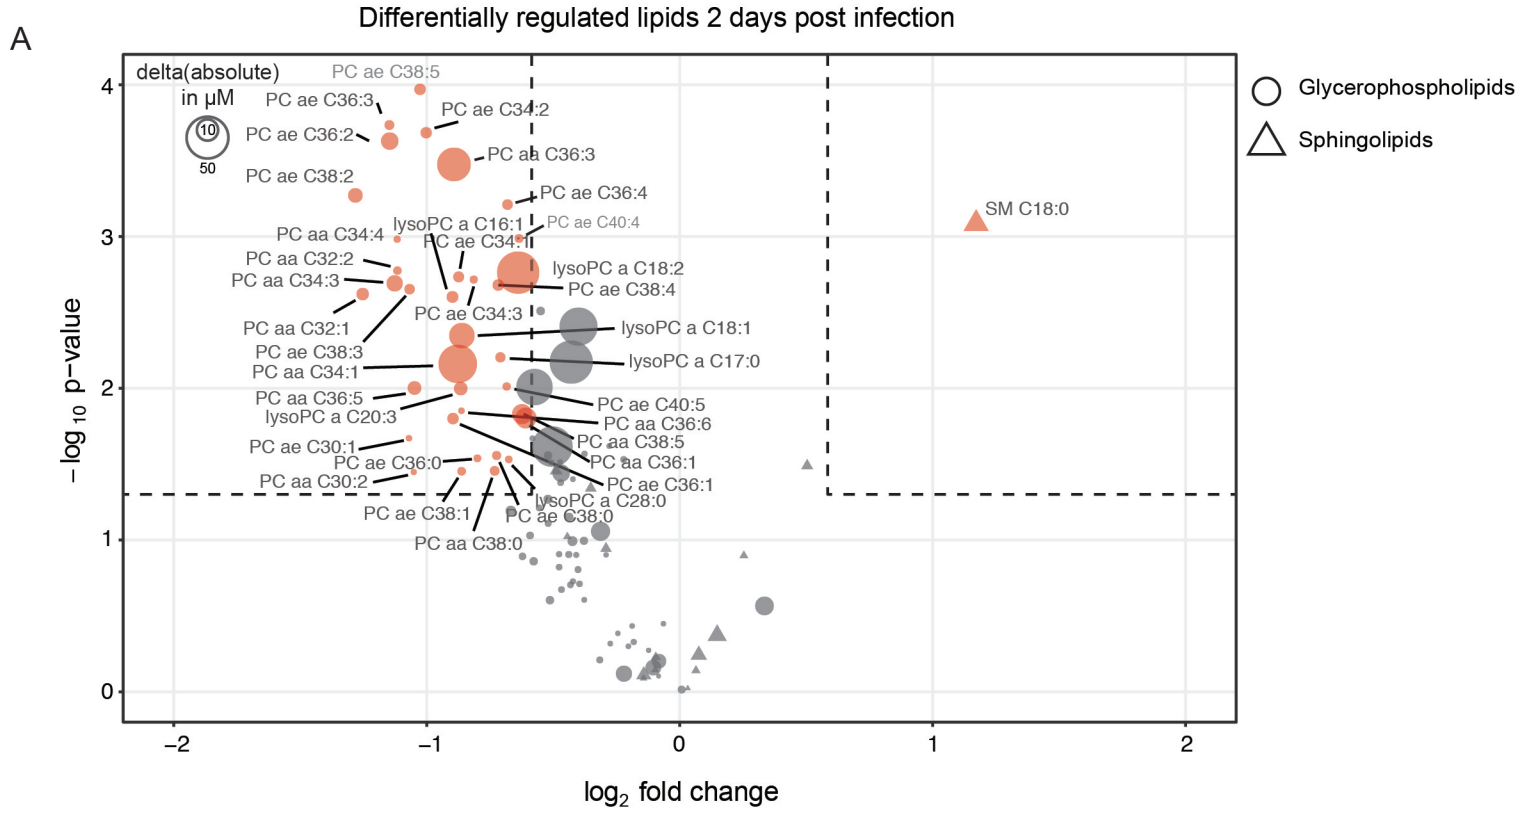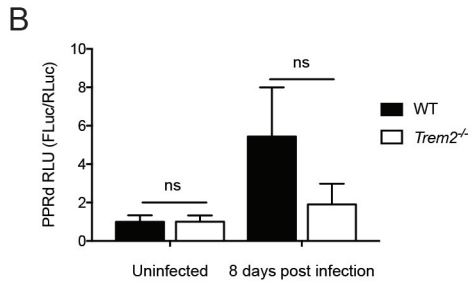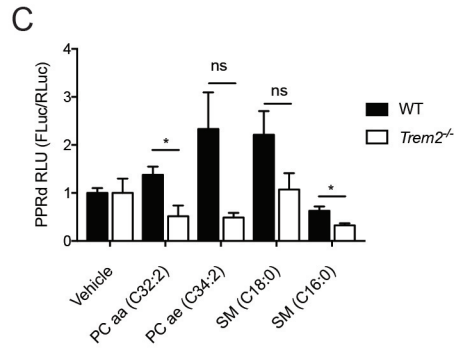



Figure S2: Similar kidney-specific serum parameters in WT and *Trem2*<sup>-/-</sup> mice

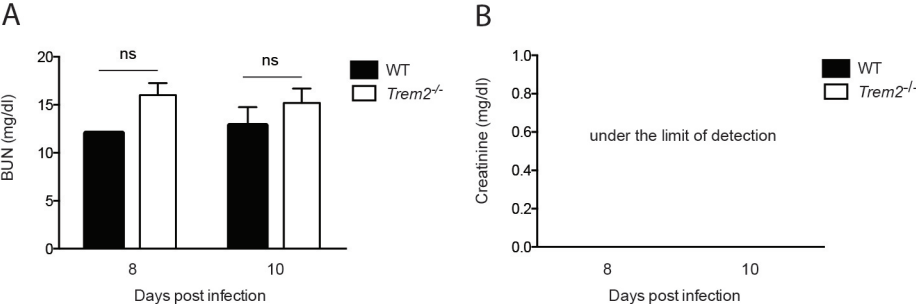

Figure S3: Similar viral propagation in primary WT and *Trem2*<sup>-/-</sup> macrophages

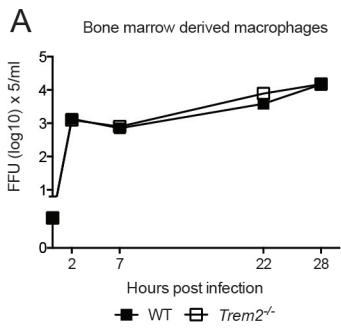

Figure S4: Effector memory T cell responses and FACS gating strategy for intracellular cytokine staining

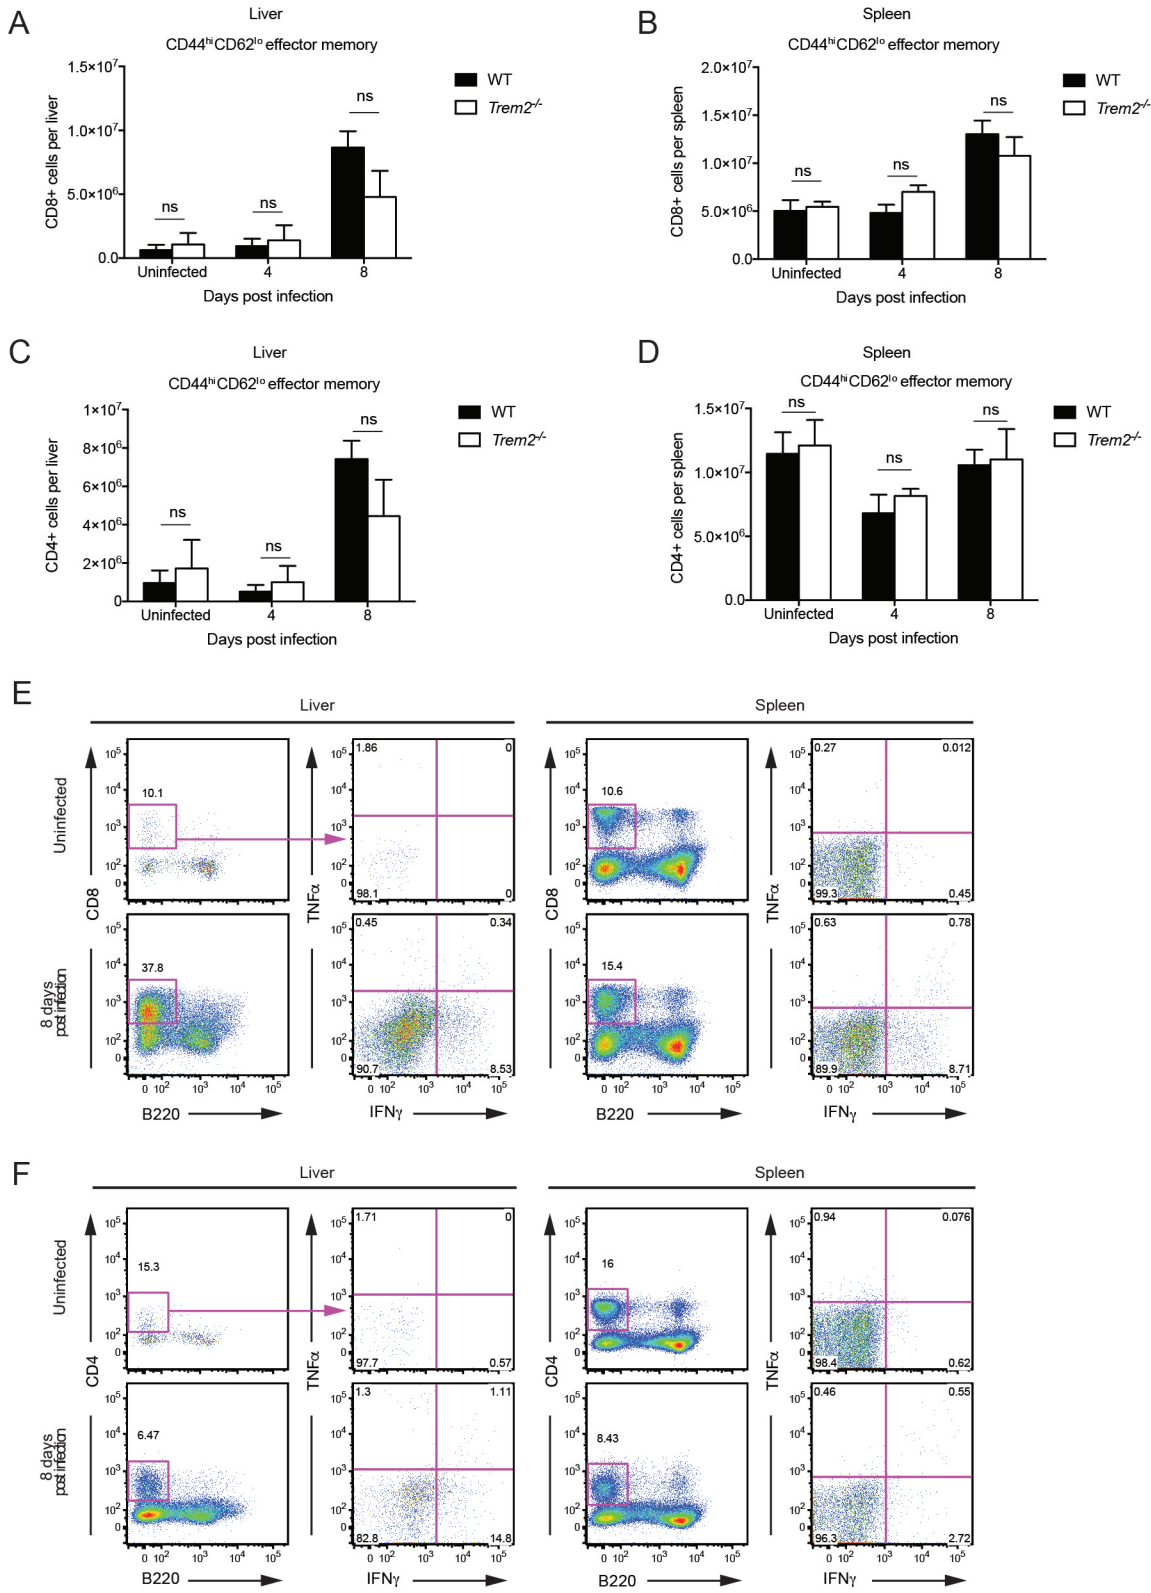

Figure S5: Concanavalin A induced acute hepatitis in WT and *Trem2*<sup>-/-</sup> mice

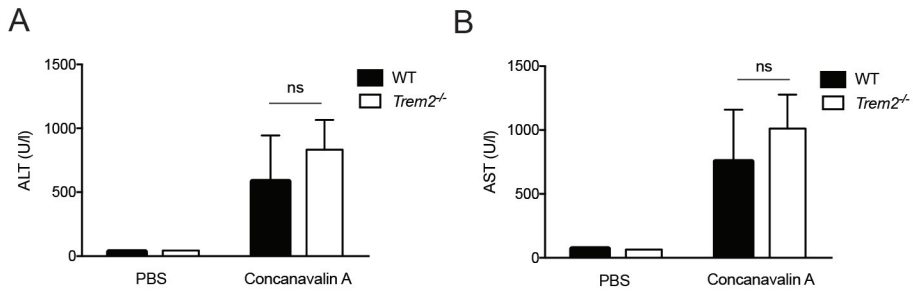

Figure S6: Profiling of lymphocyte populations in LCMV-infected WT and *Trem2*<sup>-/-</sup> mice

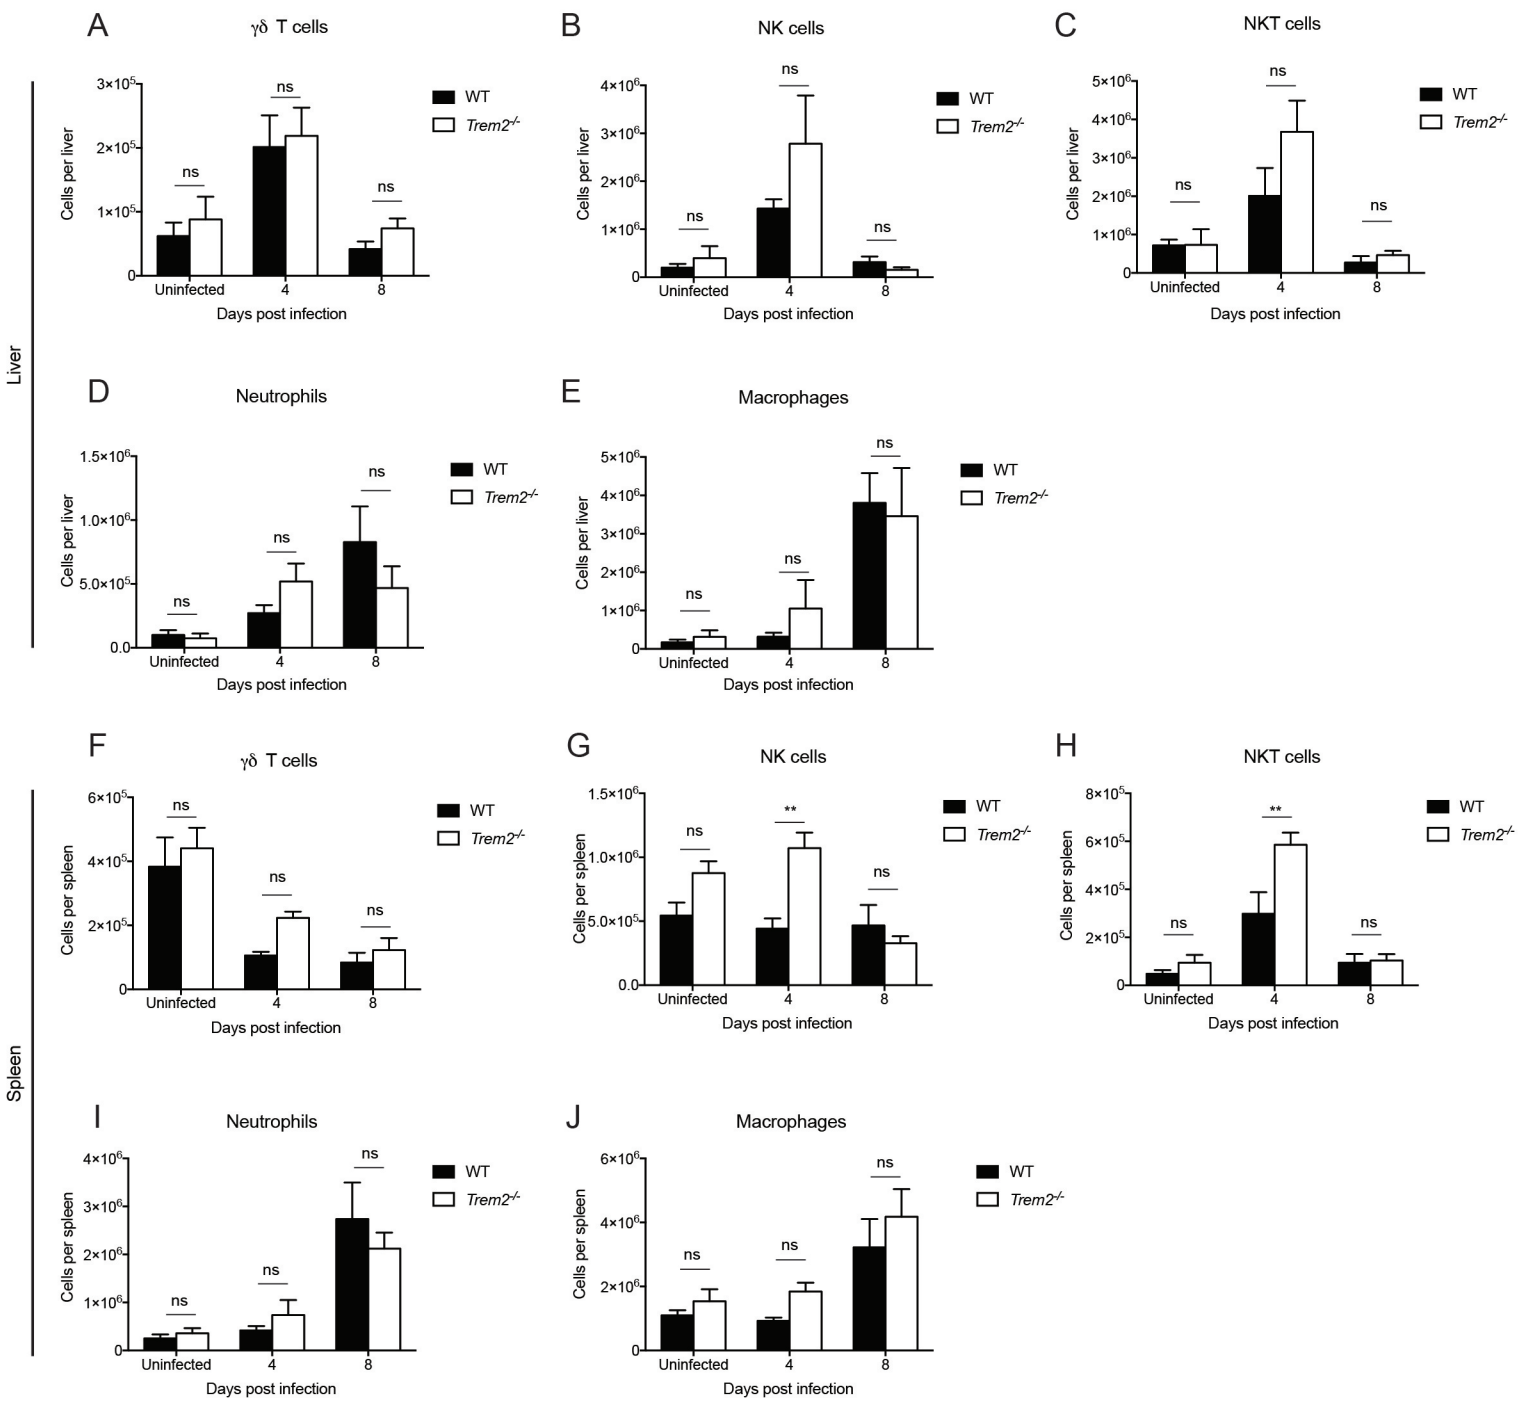

Figure S7: Serum cytokine responses in LCMV-infected WT and *Trem2*<sup>-/-</sup> mice

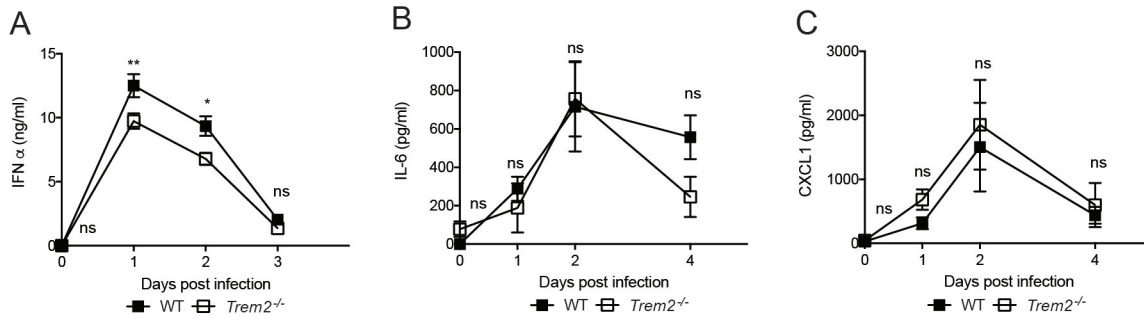

Figure S8: Confirmation of bone marrow reconstitution

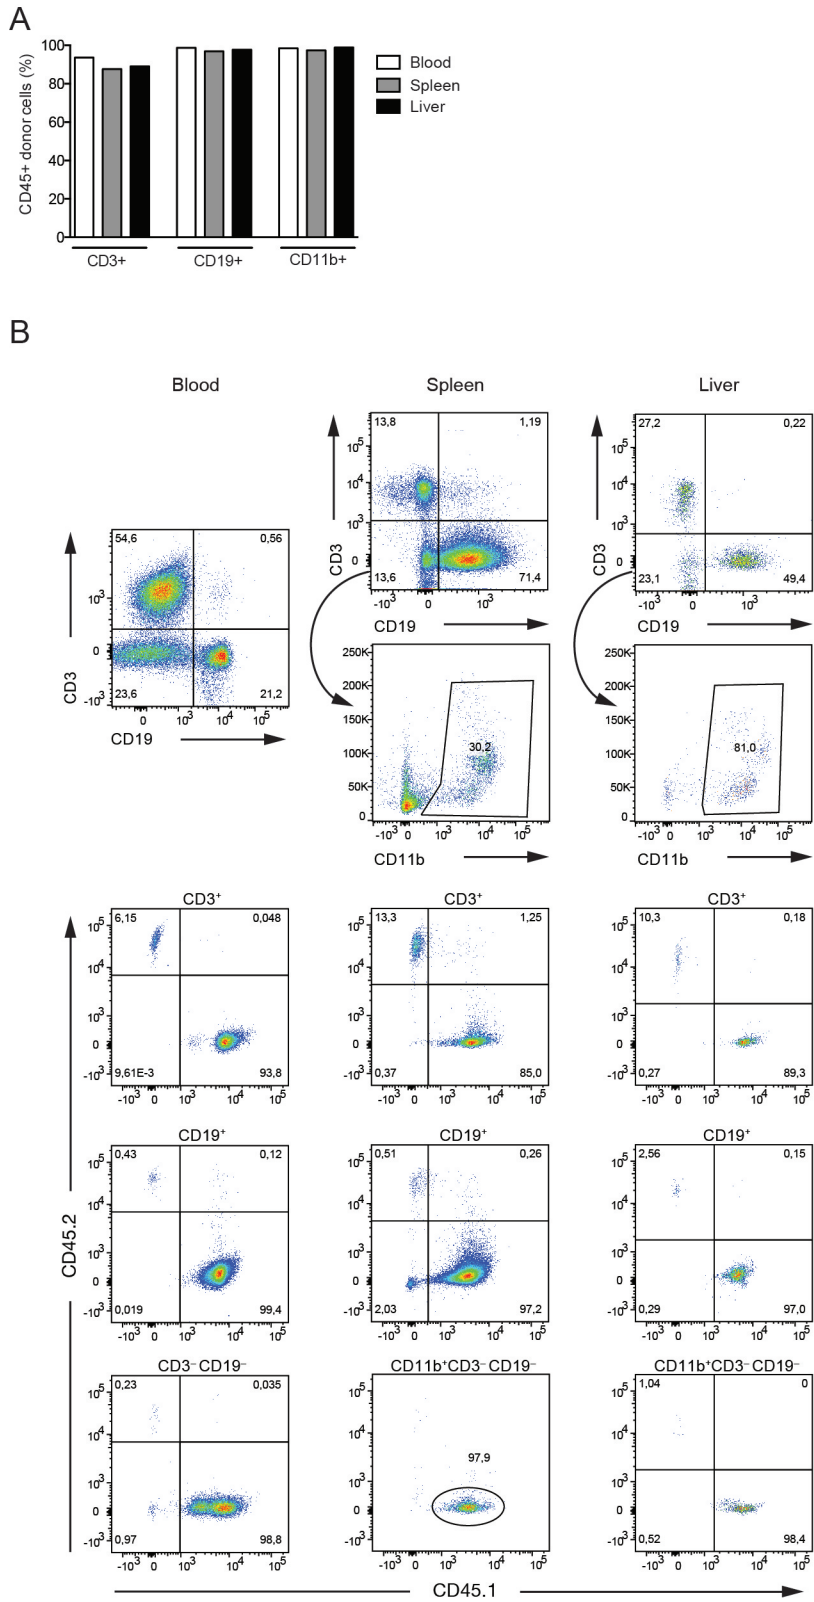

Figure S9: *Trem2* expression in primary mouse hepatocytes

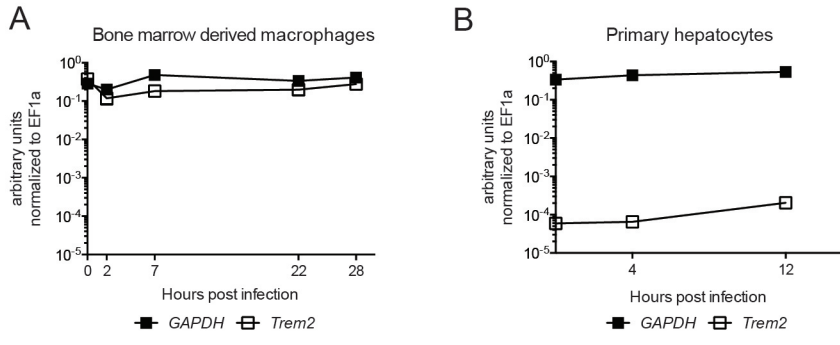

Supplement: 41598_2017_10637_MOESM1_ESM.pdf [file 41598_2017_10637_MOESM1_ESM.pdf]
